# Supplementary material for: Frailty: an in-depth qualitative study exploring the views of community care staff
Source: PubMed Central journal article supplement (PMC6381739; doi:10.1186/s12877-019-1069-3), 2019-02-19
Supplement: 12877_2019_1069_MOESM1_ESM.pdf [file 12877_2019_1069_MOESM1_ESM.pdf]

# Interview guide

## Introduction

Aim to introduce self and study using information sheet:

- Introduce self
- Introduce study
- Purpose of study
- Freedom and process of withdrawing from the study
- Duration of interview
- Recording of interview
- Confidentiality and anonymity
- Obtain written consent to proceed

## RECORDER ON

-----

*Aim: explore to which community staff group the interviewee belongs and their clinical background and experience.*

### **1. Please tell me about yourself, within your current role in the community**

Prompts:

- i. What qualifications do you have?
- ii. How long have you worked in the community?
- iii. How long in total have you been practising as a ---?

-----

*Aim: explore how interviewee views frailty.*

- 2. What does frailty mean to you?**
  - 3. Can you please describe a frail patient that you have seen in your everyday practice?**
- 

*Aim: explore how community care staff of various specialities go about assessing frailty.*

- 4. Can you please tell me how you go about assessing frailty?**

Prompt:

Do you know any frailty tools?

- 5. Do you think the other people you work with view frailty in a similar way?**
- 

*Aim: explore how community care staff of various specialities view the frailty tools*

- 6. Have you used any frailty tools and how did you find them?**

- 7. Do you have a preferred frailty tool?**

Consider response that no tool is required

Can you please tell me why you don't think we need a tool?

---

*Aim: explore the elements of frailty that community care staff of various specialties wish to assess*

**8. If I could ask you to describe your perfect frailty tool, what would it look like?**

-----

*Ending Interview*

**9. Is there anything you would like to mention that hasn't been asked that you think is relevant, or anything you wish to elaborate on?**

**RECORDER OFF**

Thank interviewee for their time and the information that they have provided

Ask if they would like to know about the findings of the study, and provide a contact email address.
